# Supplementary material for: Surface engineering of MnO2/nitrogen-doped porous carbon with a protic ionic liquid toward efficient electrochemical oxygen reduction in alkaline solution
Source: Royal Society of Chemistry journal article supplement (doi:10.1039/d6ra00814c), 2026-05-27
Supplement: d6ra00814c1.pdf [file d6ra00814c1.pdf]

Supporting Information

**Surface Engineering of MnO<sub>2</sub>/Nitrogen-Doped Porous Carbon with a Protic Ionic Liquid toward Efficient Electrochemical Oxygen Reduction in Alkaline Solution**

Md. Enamul Kabir<sup>1,#</sup>, Hasi Rani Barai<sup>2</sup>, Md. Mominul Islam<sup>1</sup>, Sang Woo Joo<sup>2</sup>, Md. Abu Bin Hasan Susan,<sup>1</sup> and Muhammed Shah Miran<sup>1\*</sup>

<sup>1</sup> Department of Chemistry, University of Dhaka, Dhaka-1000, Bangladesh

<sup>#</sup> Present Address: Department of Chemistry, Georgia State University, Atlanta, United States of America

<sup>2</sup> Department of Mechanical Engineering, Yeungnam University, Gyongsan-38541, Korea

\*Corresponding author's email address: [shahmiran@du.ac.bd](mailto:shahmiran@du.ac.bd), and Mobile: +8801818441345

**Table S1.** Kinetic parameters derived from RRDE analysis, including slope, intercept,  $k_1/k_2$  (peroxide formation ratio), and  $k_3$  (peroxide reduction rate constant), for MnO<sub>2</sub>/NPC and PIL-modified catalysts at 0.57 and 0.67 V vs RHE.

| 0.57 V vs RHE                   |         |           |           |                       |
|---------------------------------|---------|-----------|-----------|-----------------------|
| Catalyst                        | Slope   | Intercept | $k_1/k_2$ | $k_3(\text{s}^{-1})$  |
| MnO <sub>2</sub> /NPC           | -148.86 | 18.00     | 2.83      | $3.13 \times 10^{-4}$ |
| MnO <sub>2</sub> /NPC+PIL (1:2) | 114.51  | 8.19      | 1.02      | $1.16 \times 10^{-3}$ |
| MnO <sub>2</sub> /NPC+PIL (1:1) | 115.35  | 6.23      | 0.66      | $2.00 \times 10^{-3}$ |
| MnO <sub>2</sub> /NPC+PIL (2:1) | -186.41 | 19.63     | 3.13      | $3.31 \times 10^{-4}$ |
| 0.67 V vs RHE                   |         |           |           |                       |
| Catalyst                        | Slope   | Intercept | $k_1/k_2$ | $k_3(\text{s}^{-1})$  |
| MnO <sub>2</sub> /NPC           | 0       | 7.51      | 0.89      | 0                     |
| MnO <sub>2</sub> /NPC+PIL (1:2) | 31.14   | 8.17      | 1.01      | $3.20 \times 10^{-4}$ |
| MnO <sub>2</sub> /NPC+PIL (1:1) | 11.17   | 6.58      | 0.71      | $1.78 \times 10^{-4}$ |
| MnO <sub>2</sub> /NPC+PIL (2:1) | 70.52   | 5.94      | 0.60      | $1.36 \times 10^{-3}$ |

$$D_{\text{H}_2\text{O}_2} \approx 1.4 \times 10^{-5} \text{ cm}^2/\text{s}, \quad \nu \approx 0.01 \text{ cm}^2/\text{s}^{-1}$$

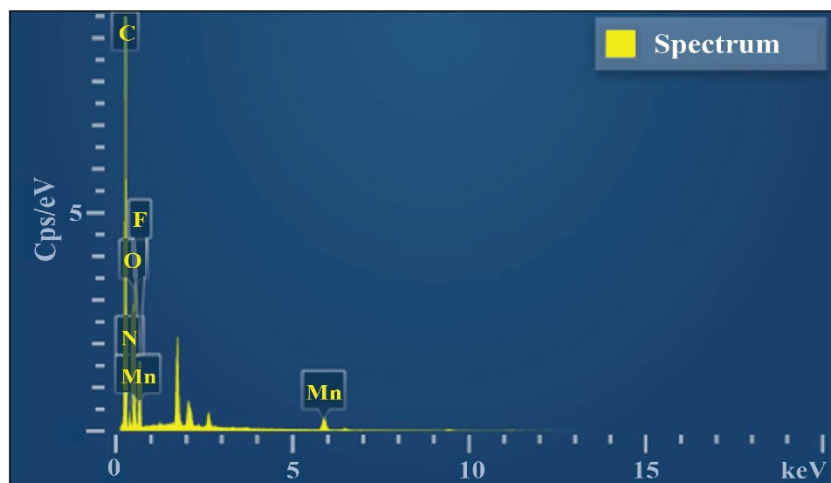

**Figure S1.** EDX spectrum of synthesized MnO<sub>2</sub>/NPC-400+PIL (1:2).

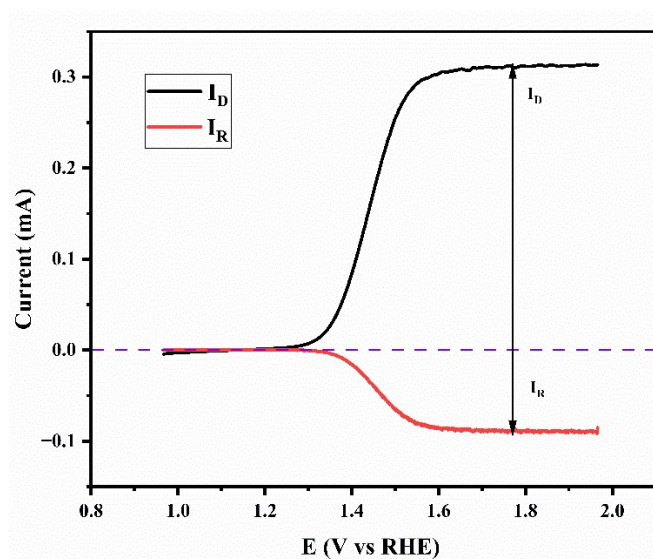

**Figure S2.** RRDE disk (top) and ring (bottom) currents for 1.0 mM K<sub>4</sub>[Fe(CN)<sub>6</sub>] in a 0.05 M H<sub>2</sub>SO<sub>4</sub> supporting electrolyte. Rotation rate: 1600 rpm, scan rate: 50 mV s<sup>-1</sup>.

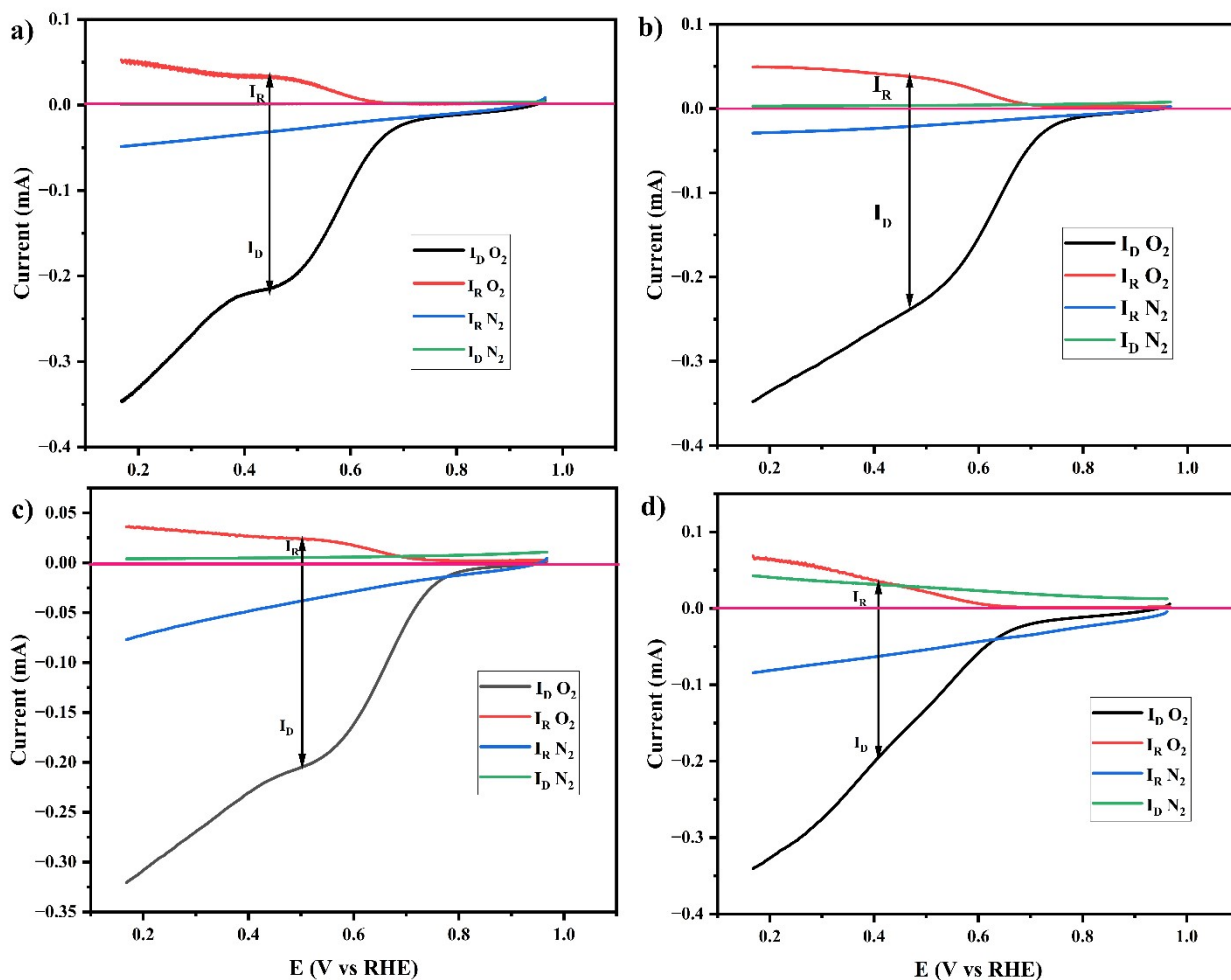

**Figure S3.** RRDE voltammograms showing disk ( $I_D$ ) and ring ( $I_R$ ) currents recorded in  $O_2$ - and  $N_2$ -saturated electrolyte for (a) MnO<sub>2</sub>/NPC-400, (b) MnO<sub>2</sub>/NPC-400+PIL (1:1), (c) MnO<sub>2</sub>/NPC-400+PIL (1:2), and (d) MnO<sub>2</sub>/NPC-400+PIL (2:1) catalysts, plotted as current vs potential (V vs RHE).

1. L. Zhang, H. Li and J. Zhang, *J. Power Sources*, 2014, **255**, 242–250, DOI: 10.1016/j.jpowsour.2014.01.042.
